# Supplementary material for: Genome-wide analysis of WRKY gene family and the dynamic responses of key WRKY genes involved in cadmium stress in Brassica juncea
Source: Frontiers journal article supplement (doi:10.3389/fpls.2024.1465905), 2024-10-10
Supplement: Data_Sheet_1.pdf [file Data_Sheet_1.pdf]

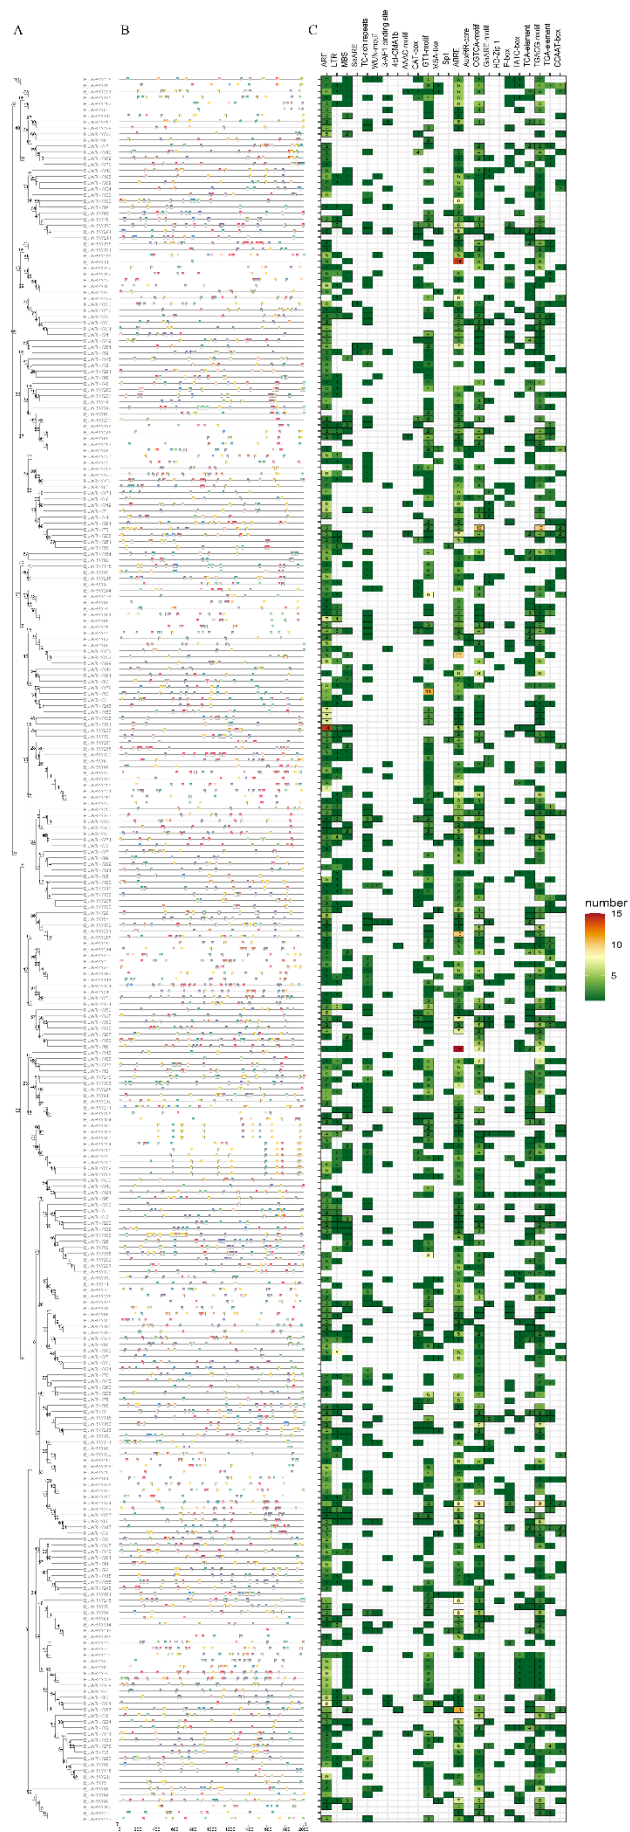

Fig.S1 Analysis of cis-acting elements in the *BjuWRKY* promoter region. (A) Phylogenetic analysis of *BjuWRKY* genes. (B) Distribution of related cis-acting elements in *BjuWRKY* promoters. (C) The number of each cis-acting element in the promoter region (2 kb upstream of the translation start site) of *BjuWRKY* genes.

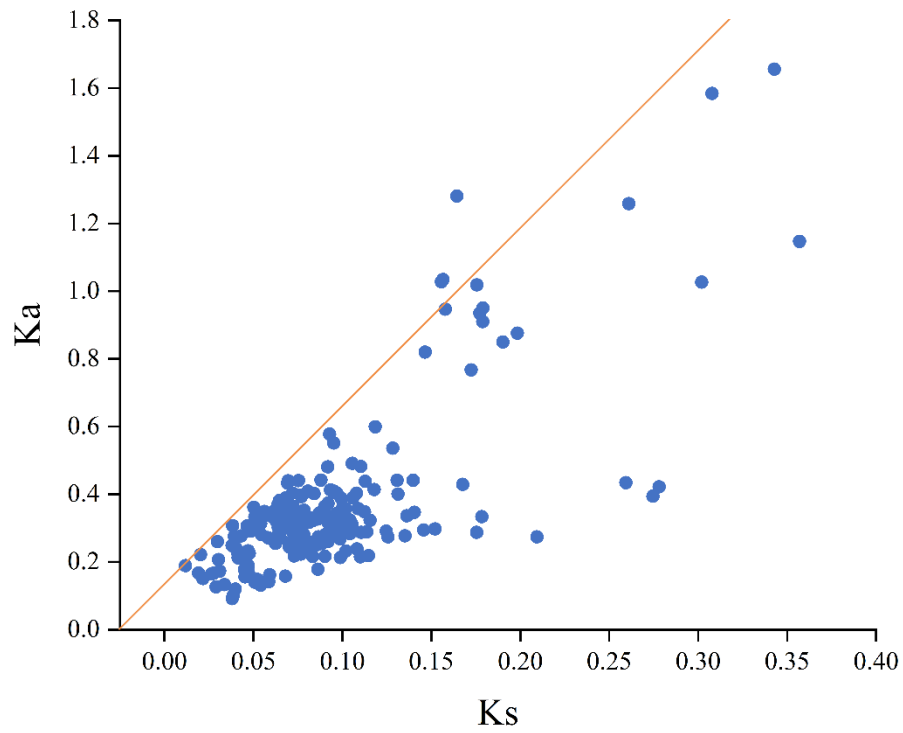

Fig.S2 Distribution of Ka and Ks from *B. juncea* gene pairs.

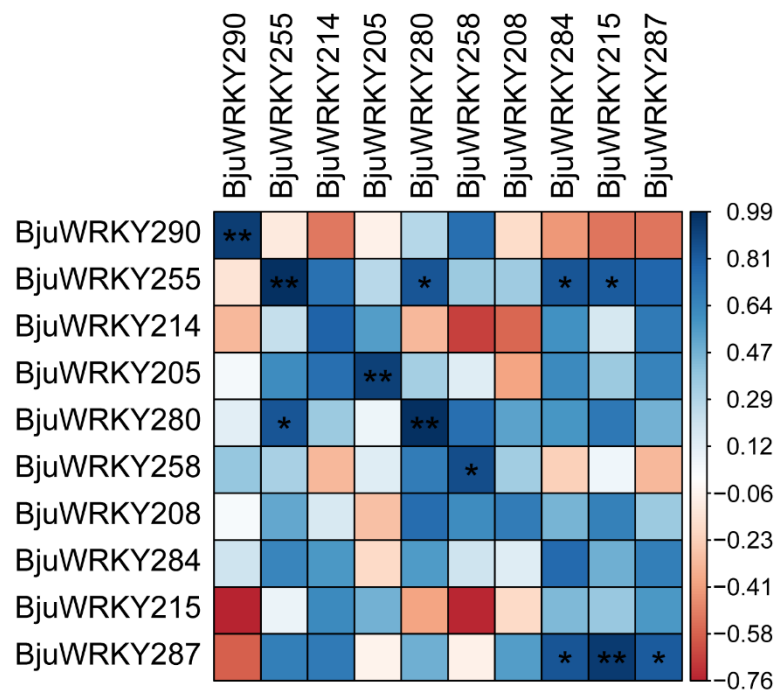

Fig.S3 The Spearman analysis between the RNA-seq and qRT-PCR results for ten hub genes. The colors of the box represent the degree of correlation; blue color represents the highest degree of correlation and red color represents the lowest degree of correlation. \*  $p < 0.05$ , \*\*  $p < 0.01$ .
